# Supplementary material
Source: PubMed Central journal article supplement (PMC3889115)

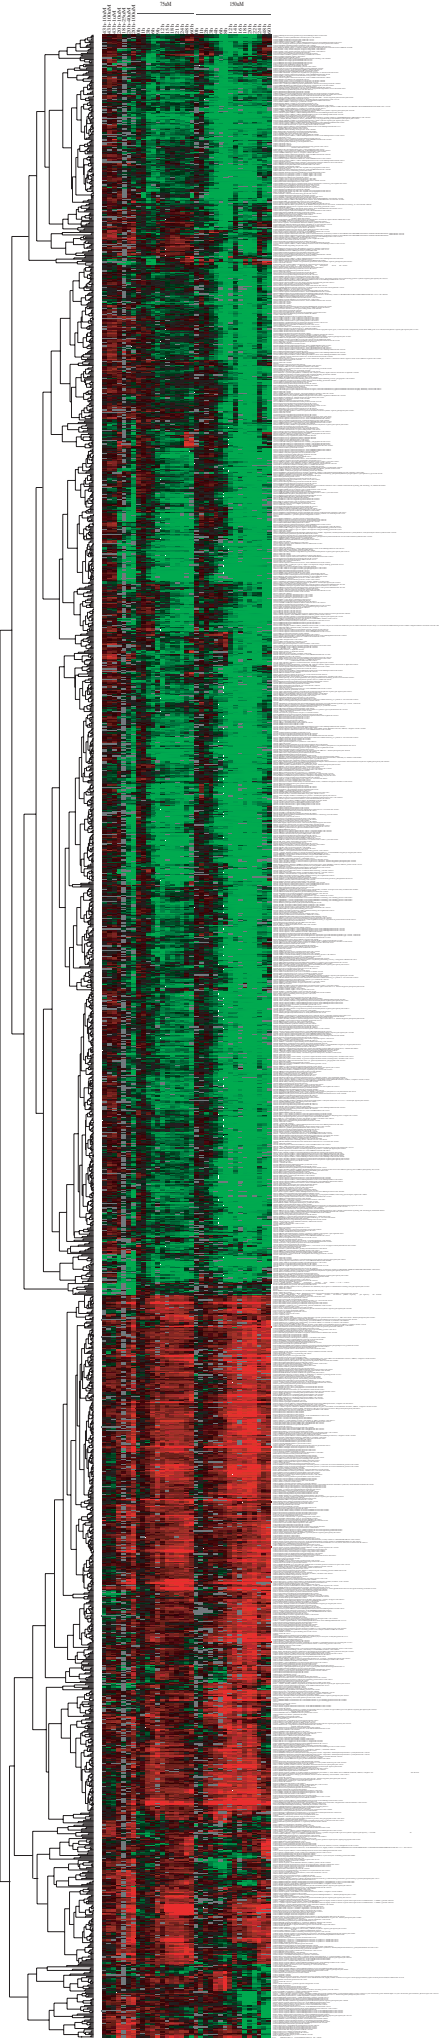

Supplemental Figure 1

Supplement: NIHMS353605-supplement-Supplemental_Fig_1.pdf [file NIHMS353605-supplement-Supplemental_Fig_1.pdf]
